# Supplementary material
Source: PubMed Central journal article supplement (PMC5684669)
Supplement: Supp_Fig1.pdf [file Supp_Fig1.pdf]

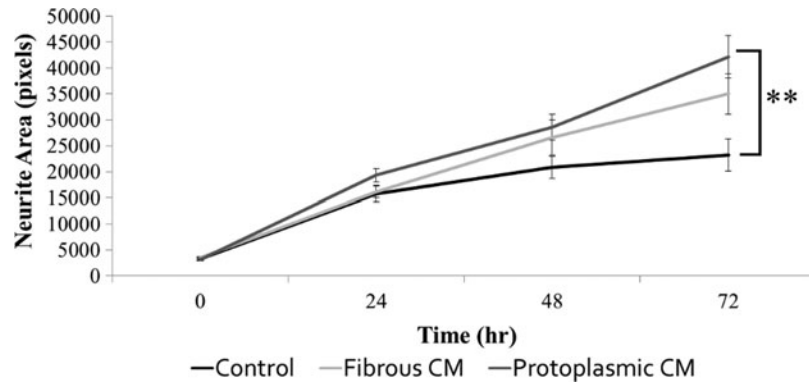

**SUPPLEMENTARY FIG. S1.** Protoplasmic CM significantly improves motoneuron growth. Neurite area per nucleus of motoneurons grown in fibrous and protoplasmic astrocyte CM over 72 h. Error bars: Standard error,  $n = 14-21$ ,  $**P < 0.01$ . CM, conditioned media.
