# Supplementary material
Source: PubMed Central journal article supplement (PMC5684669)
Supplement: Supp_Fig2.pdf [file Supp_Fig2.pdf]

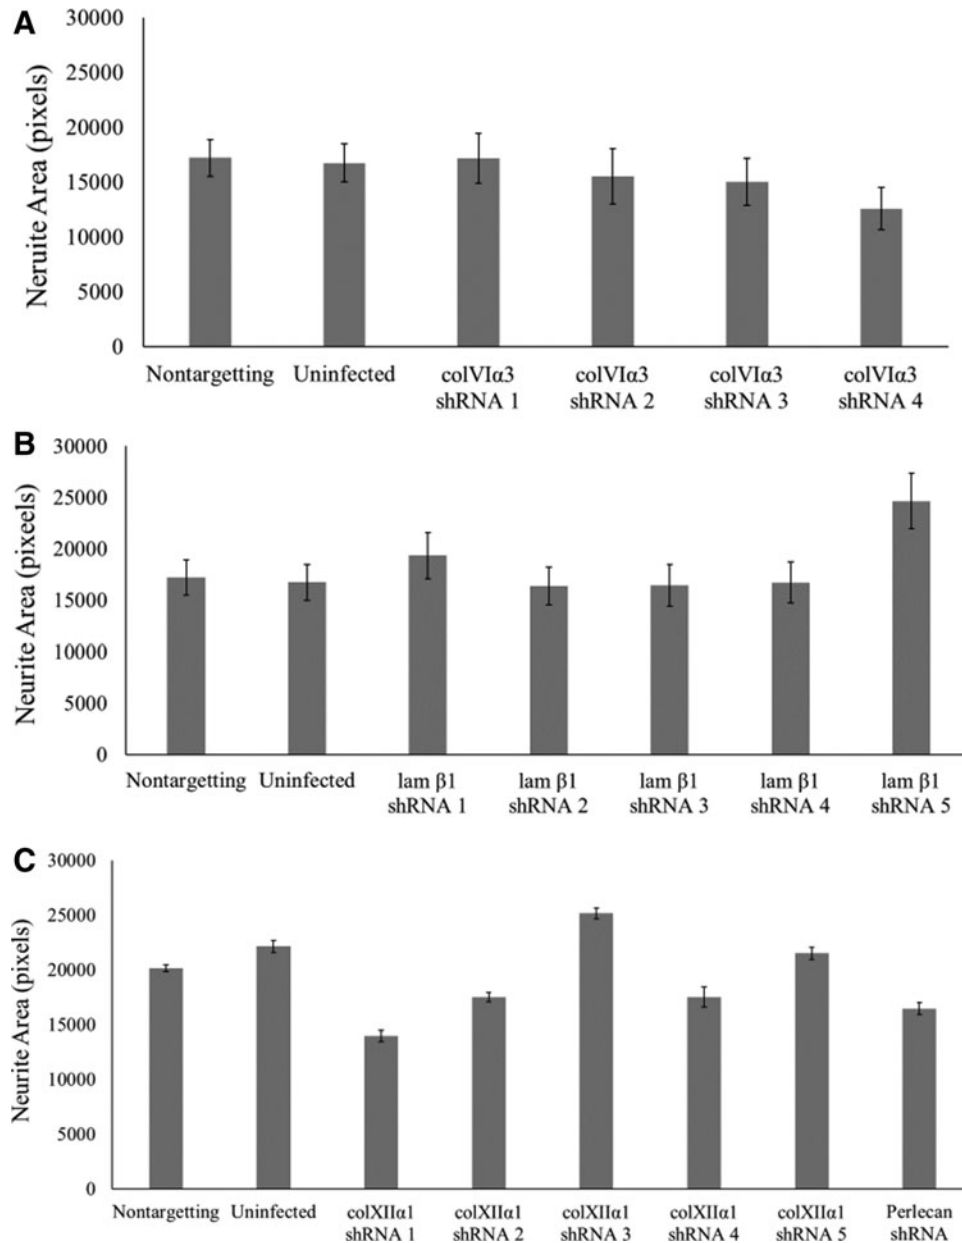

**SUPPLEMENTARY FIG. S2.** Knockdown of collagen VI $\alpha$ 3, laminin  $\beta$ 1, collagen XII $\alpha$ 1, or perlecan does not significantly alter motoneuron growth on protoplasmic astrocyte ECM. **(A)** Effect of collagen VI $\alpha$ 3 (colVI $\alpha$ 3) knockdown on motoneuron neurite length on resulting protoplasmic ECM.  $N=15-67$ . Four separate shRNA constructs were used. **(B)** Effect of laminin  $\beta$ 1 (lam  $\beta$ 1) knockdown on motoneuron neurite length.  $N=19-67$ . Five separate shRNA constructs were used. **(C)** Effect of collagen XII $\alpha$ 1 (colXII $\alpha$ 1) and perlecan knockdown on motoneuron neurite length on resulting protoplasmic ECM.  $N=13-30$ . Five separate shRNA constructs were used for collagen XII $\alpha$ 1 and 1 previously validated construct was used for perlecan. ECM, extracellular matrix.
