# Supplementary material
Source: PubMed Central journal article supplement (PMC5684669)
Supplement: Supp_Fig3.pdf [file Supp_Fig3.pdf]

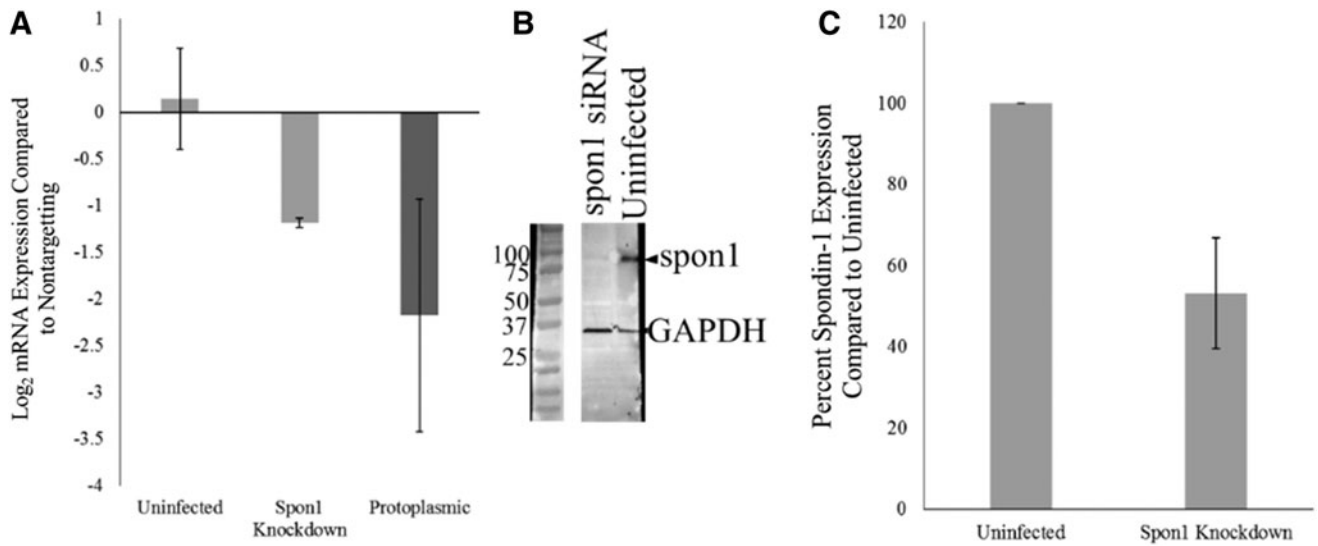

**SUPPLEMENTARY FIG. S3.** Spondin-1 shRNA decreases both mRNA and protein expression. **(A)** mRNA levels decrease in fibrous astrocyte cultures treated with spon1 shRNA when compared to astrocytes infected with nontargeting shRNA. **(B)** Representative western blot showing Spondin-1 and GAPDH in knockdown and uninfected astrocyte cultures. **(C)** Western blot quantification using densitometry shows decreased spondin-1 in cultures treated with spon1 shRNA.  $n=2$ , Error bars: 95% confidence interval.
