# Supplementary material
Source: PubMed Central journal article supplement (PMC5684669)
Supplement: Supp_Table1.pdf [file Supp_Table1.pdf]

SUPPLEMENTARY TABLE S1. PROTEINS FOUND TO HAVE SIGNIFICANTLY DIFFERENT EXPRESSION IN MOUSE EMBRYONIC STEM CELL-DERIVED ASTROCYTE EXTRACELLULAR MATRIX LISTED IN DECREASING NUMBER OF AVERAGE SPECTRA DETECTED

| <i>Significantly enriched in fibrous ECM</i>                     | <i>Average percent of total spectra</i> | <i>Significantly enriched in protoplasmic ECM</i>                    | <i>Average percent of total spectra</i> |
|------------------------------------------------------------------|-----------------------------------------|----------------------------------------------------------------------|-----------------------------------------|
| Cytoplasmic dynein 1 heavy chain 1                               | 0.37                                    | Fibronectin                                                          | 2.25                                    |
| Vimentin                                                         | 0.31                                    | Myosin-9                                                             | 1.27                                    |
| Spondin-1                                                        | 0.30                                    | Basement membrane-specific heparan sulfate proteoglycan core protein | 0.74                                    |
| Tubulin beta-2B chain                                            | 0.15                                    | Myosin-10                                                            | 0.66                                    |
| Latent-transforming growth factor beta-binding protein 1         | 0.13                                    | Collagen alpha-1 (XII) chain                                         | 0.59                                    |
| Combined horseradish peroxidase                                  | 0.11                                    | Protein Ahnak                                                        | 0.37                                    |
| Tenascin                                                         | 0.11                                    | Protein Col6a3                                                       | 0.32                                    |
| Neurocan core protein                                            | 0.11                                    | Laminin subunit alpha-5                                              | 0.29                                    |
| Versican core protein                                            | 0.10                                    | Plectin                                                              | 0.21                                    |
| Glia-derived nexin                                               | 0.10                                    | Filamin-A                                                            | 0.21                                    |
| Protein Fndc1                                                    | 0.10                                    | Laminin subunit gamma-1                                              | 0.2                                     |
| Heat shock protein HSP 90-beta                                   | 0.07                                    | Fibrillin-1                                                          | 0.17                                    |
| Keratin, type I cytoskeletal 14                                  | 0.07                                    | Laminin subunit beta-2                                               | 0.17                                    |
| Keratin, type II cytoskeletal 5                                  | 0.07                                    | Agrin                                                                | 0.15                                    |
| Tissue-type plasminogen activator                                | 0.06                                    | Laminin subunit beta-1                                               | 0.13                                    |
| Desmoplakin                                                      | 0.05                                    | Protein-glutamine gamma-glutamyltransferase 2                        | 0.12                                    |
| Peroxidasin homolog                                              | 0.05                                    | EMILIN-1                                                             | 0.10                                    |
| A disintegrin and metalloproteinase with thrombospondin motifs 4 | 0.05                                    | Fibrillin-2                                                          | 0.09                                    |
| Creatine kinase B-type                                           | 0.05                                    | Collagen alpha-1 (VI) chain                                          | 0.09                                    |
| Multiple epidermal growth factor-like domains protein 6          | 0.04                                    | Nidogen-1                                                            | 0.09                                    |
| Semaphorin-3A                                                    | 0.04                                    | Nidogen-2                                                            | 0.09                                    |
| T-complex protein 1 subunit delta                                | 0.04                                    | Myosin-11                                                            | 0.08                                    |
| Fatty acid synthase                                              | 0.04                                    | Laminin subunit alpha-1                                              | 0.07                                    |
| Keratin, type II cytoskeletal 2 epidermal                        | 0.04                                    | Collagen alpha-2 (VI) chain                                          | 0.07                                    |
| Unconventional myosin-Va                                         | 0.04                                    | Unconventional myosin-1c                                             | 0.06                                    |
| D-3-phosphoglycerate dehydrogenase                               | 0.04                                    | Periostin                                                            | 0.06                                    |
| SPARC-related modular calcium-binding protein 1                  | 0.04                                    | Inter-alpha-trypsin inhibitor heavy chain H5                         | 0.06                                    |
| Keratin, type I cytoskeletal 10                                  | 0.03                                    | Collagen alpha-2 (IV) chain                                          | 0.05                                    |
| Splicing factor, proline and glutamine rich                      | 0.03                                    | Collagen alpha-1 (XVIII) chain                                       | 0.05                                    |
| Transcription activator BRG1                                     | 0.03                                    | Collagen alpha-1 (IV) chain                                          | 0.05                                    |
| Ubiquitin-like modifier-activating enzyme 1                      | 0.03                                    | Myosin phosphatase Rho-interacting protein                           | 0.04                                    |
| Alpha-enolase                                                    | 0.03                                    | Annexin A1                                                           | 0.04                                    |
| Phosphoglycerate kinase 1                                        | 0.03                                    | Collagen alpha-1 (V) chain                                           | 0.04                                    |
| Protein Gm20425                                                  | 0.03                                    | Tubulointerstitial nephritis antigen like                            | 0.04                                    |

(continued)

SUPPLEMENTARY TABLE S1. (CONTINUED)

| <i>Significantly enriched in fibrous ECM</i>         | <i>Average percent of total spectra</i> | <i>Significantly enriched in protoplasmic ECM</i>     | <i>Average percent of total spectra</i> |
|------------------------------------------------------|-----------------------------------------|-------------------------------------------------------|-----------------------------------------|
| Lamin-B1                                             | 0.03                                    | Cytochrome P450 1B1                                   | 0.03                                    |
| Dedicator of cytokinesis protein 1                   | 0.03                                    | Myoferlin                                             | 0.03                                    |
| Junction plakoglobin                                 | 0.03                                    | Protein Atp2b4                                        | 0.03                                    |
| Netrin-1                                             | 0.03                                    | Sorbin and SH3 domain-containing protein 2            | 0.03                                    |
| Mitogen-activated protein kinase kinase kinase 4     | 0.02                                    | E3 ubiquitin-protein ligase RNF213                    | 0.02                                    |
| Nuclear pore membrane glycoprotein 210               | 0.02                                    | Collagen alpha-2 (V) chain                            | 0.02                                    |
| Low-density lipoprotein receptor-related protein 2   | 0.02                                    | Transforming growth factor-beta-induced protein ig-h3 | 0.02                                    |
| Nascent polypeptide-associated complex subunit alpha | 0.02                                    | Dysferlin                                             | 0.02                                    |
| WSC domain-containing protein 1                      | 0.02                                    | Thrombospondin type-1 domain-containing protein 4     | 0.02                                    |
| Fructose-biphosphate aldolase C                      | 0.02                                    | Collagen alpha-1 (XIV) chain                          | 0.01                                    |
| Plakophilin-1                                        | 0.02                                    |                                                       |                                         |
| 14-3-3 protein theta (Fragment)                      | 0.02                                    |                                                       |                                         |
| Interleukin enhancer-binding factor 3                | 0.01                                    |                                                       |                                         |
| Bone morphogenetic protein 1                         | 0.01                                    |                                                       |                                         |
| Extracellular sulfatase Sulf-2                       | 0.01                                    |                                                       |                                         |
| Nephronectin                                         | 0.01                                    |                                                       |                                         |
| Heat shock protein HSP 90-alpha                      | 0.01                                    |                                                       |                                         |
| Transforming growth factor beta-2                    | 0.01                                    |                                                       |                                         |
| Microtubule-associated protein 2                     | 0.01                                    |                                                       |                                         |
| Phosphoserine aminotransferase                       | 0.01                                    |                                                       |                                         |
| Keratin, type I cytoskeletal 16                      | 0.01                                    |                                                       |                                         |
| Plectrophin                                          | 0.01                                    |                                                       |                                         |
| Apolipoprotein E                                     | 0.01                                    |                                                       |                                         |
| Dynactin subunit 1                                   | 0.01                                    |                                                       |                                         |
| Multifunctional protein ADE2                         | 0.01                                    |                                                       |                                         |
| Fatty acid-binding protein, brain                    | 0.01                                    |                                                       |                                         |
| T-complex protein 1 subunit theta                    | 0.01                                    |                                                       |                                         |

*n* = 2.

ECM, extracellular matrix.
